# Supplementary material for: Evolution of substrate recognition sites (SRSs) in cytochromes P450 from Apiaceae exemplified by the CYP71AJ subfamily
Source: PubMed Central journal article supplement (PMC4482195; doi:10.1186/s12862-015-0396-z), 2015-06-26

## A. Linear furanocoumarins

Demethylsuberosin

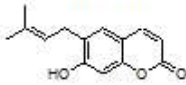

(+)-Marmesin

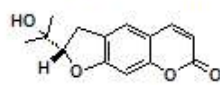

5-hydroxymarmesin

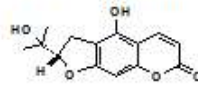

Psoralen

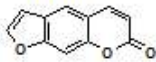

Bergaptol

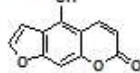

Xanthotoxol

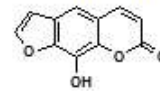

Bergapten

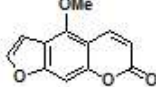

Xanthotoxin

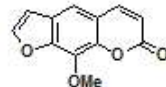

Isopimpinelline

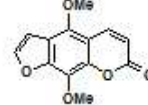

5-hydroxyxanthotoxin

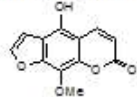

8-hydroxybergapten

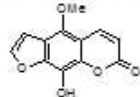

5,8-dihydroxypsoralen

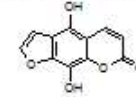

Cnidilin

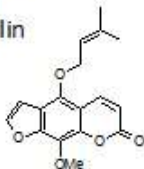

Phellopterin

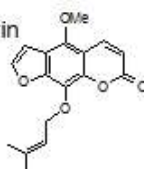

Imperatorine

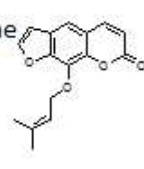

Isoimperatorine

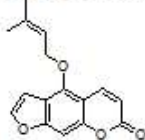

Bergamottine

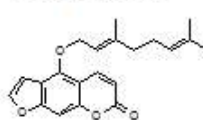

8-methylpsoralen

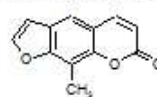

## B. Angular furanocoumarins

Osthenol

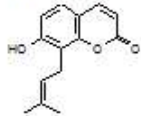

(+)-Columbianetin

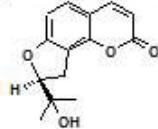

Angelicin

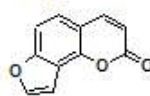

5,6-dihydroxyangelicin

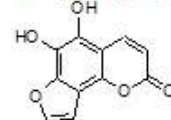

Pimpinelline

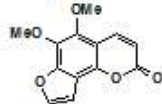

Isobergaptol

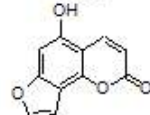

Sphondinol

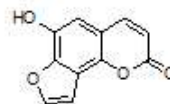

Sphondin

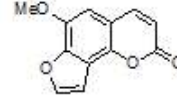

Isobergapten

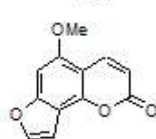

6-isopentenylxyisobergaptol

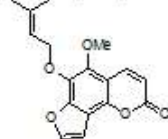

Heratomine

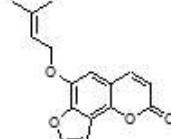

Lanatine

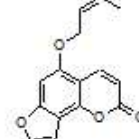

### C. Coumarins

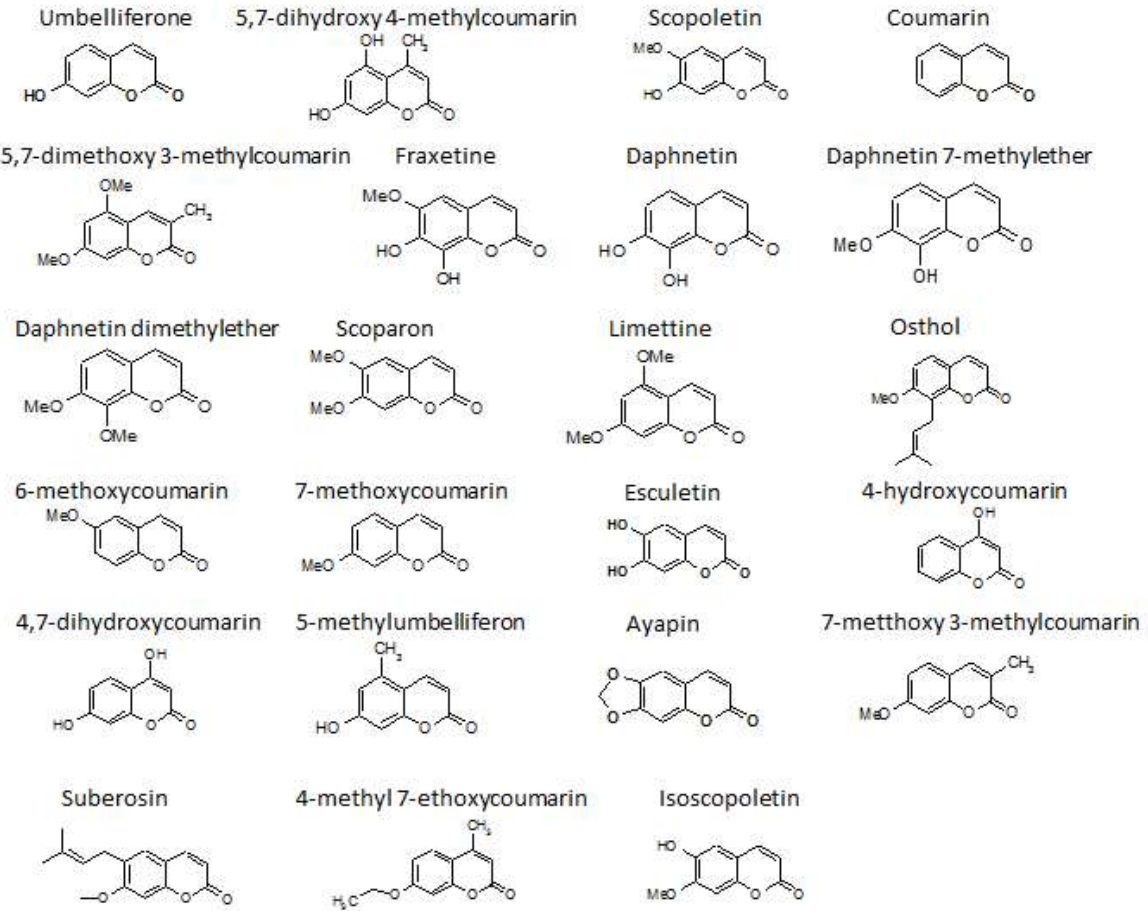

### D. Smaller molecules

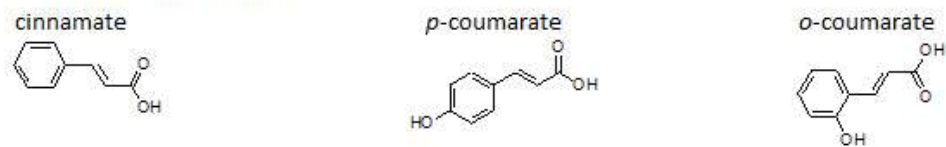

Supplement: 12862_2015_396_MOESM1_ESM.pdf [file 12862_2015_396_MOESM1_ESM.pdf]
