# Supplementary material for: Evolution of substrate recognition sites (SRSs) in cytochromes P450 from Apiaceae exemplified by the CYP71AJ subfamily
Source: PubMed Central journal article supplement (PMC4482195; doi:10.1186/s12862-015-0396-z), 2015-06-26
Supplement: 12862_2015_396_MOESM3_ESM.pdf [file 12862_2015_396_MOESM3_ESM.pdf]

### Additional file 3

List of primers used for PCR-based fishing approach.

| Primer name | Sequence (5'-3') (F/R)                 | Targets (perfect seq match)                                     | Tm (°C) |
|-------------|----------------------------------------|-----------------------------------------------------------------|---------|
| AJ5-int-F   | GTAAAAAGTATTTGTGTTCTTCAGC (F)          | CYP71AJ5,<br>CYP71AJ6,<br>CYP71AJ12,<br>CYP71AJ14               | 52      |
| AJ5-int-R   | TGTC AATAGAAAAGGCGGAATT (R)            | CYP71AJ5,<br>CYP71AJ7,<br>CYP71AJ15,<br>CYP71AJ17,<br>CYP71AJ18 | 54      |
| AJ5-ATG     | ATGATGATGGACCAGCAAACCC (F)             | CYP71AJ5                                                        | 59      |
| AJ5-stop    | CTAGACTCGTGATGTCGCAATC (R)             | CYP71AJ5,<br>CYP71AJ6                                           | 56      |
| AJ6-ATG     | ATGATGGACCAGCAAACCCCTGTTCTATCT (F)     | CYP71AJ6                                                        | 62      |
| AJ7-F       | ATGATGGACCAACAAGCCTTG (F)              | CYP71AJ7                                                        | 57      |
| AJ7-R       | CTAGACTCGTGATGTCGCAAT (R)              | CYP71AJ7                                                        | 56      |
| AJ8-F       | ATGGACCAACAATCCTTGTTTC (F)             | CYP71AJ8                                                        | 55      |
| AJ8-AJ9-R   | TTAGACACGTGATGTTGCGA (R)               | CYP71AJ8,<br>CYP71AJ9                                           | 55      |
| AJ12-ATG    | ATGATACTAGATCAACAACCTTTGTTTCTGTC (F)   | CYP71AJ12                                                       | 57      |
| AJ12-stop   | CTAGATACGTGGCGTTGCAATCACCAACAG (R)     | CYP71AJ12,<br>CYP71AJ14                                         | 64      |
| AJ14-ATG    | ATGATACTAGATCAACAATTCTTGTTTCTATC (F)   | CYP71AJ14                                                       | 54      |
| Bc_red-R    | TCAAACATGTGGTTTGGCAATCACCAAAAG (R)     | CYP71AJ31                                                       | 59      |
| Bc_blue-F   | ATGAAGGACCAATATCTTCTCTACCTATATTTTC (F) | CYP71AJ32                                                       | 58      |
| Bc_green-R  | CCTGTGAGTAAATCAACCAACAAAGCAA (R)       | CYP71AJ32                                                       | 59      |
