# Supplementary material for: Evolution of substrate recognition sites (SRSs) in cytochromes P450 from Apiaceae exemplified by the CYP71AJ subfamily
Source: PubMed Central journal article supplement (PMC4482195; doi:10.1186/s12862-015-0396-z), 2015-06-26

Additional file 4

Partial tree of the selection of AA 120-220 from the alignment made for figure 2.

Please observe, that the clade marking is based on Figure 2, and not all groups and clades are well supported in this tree.

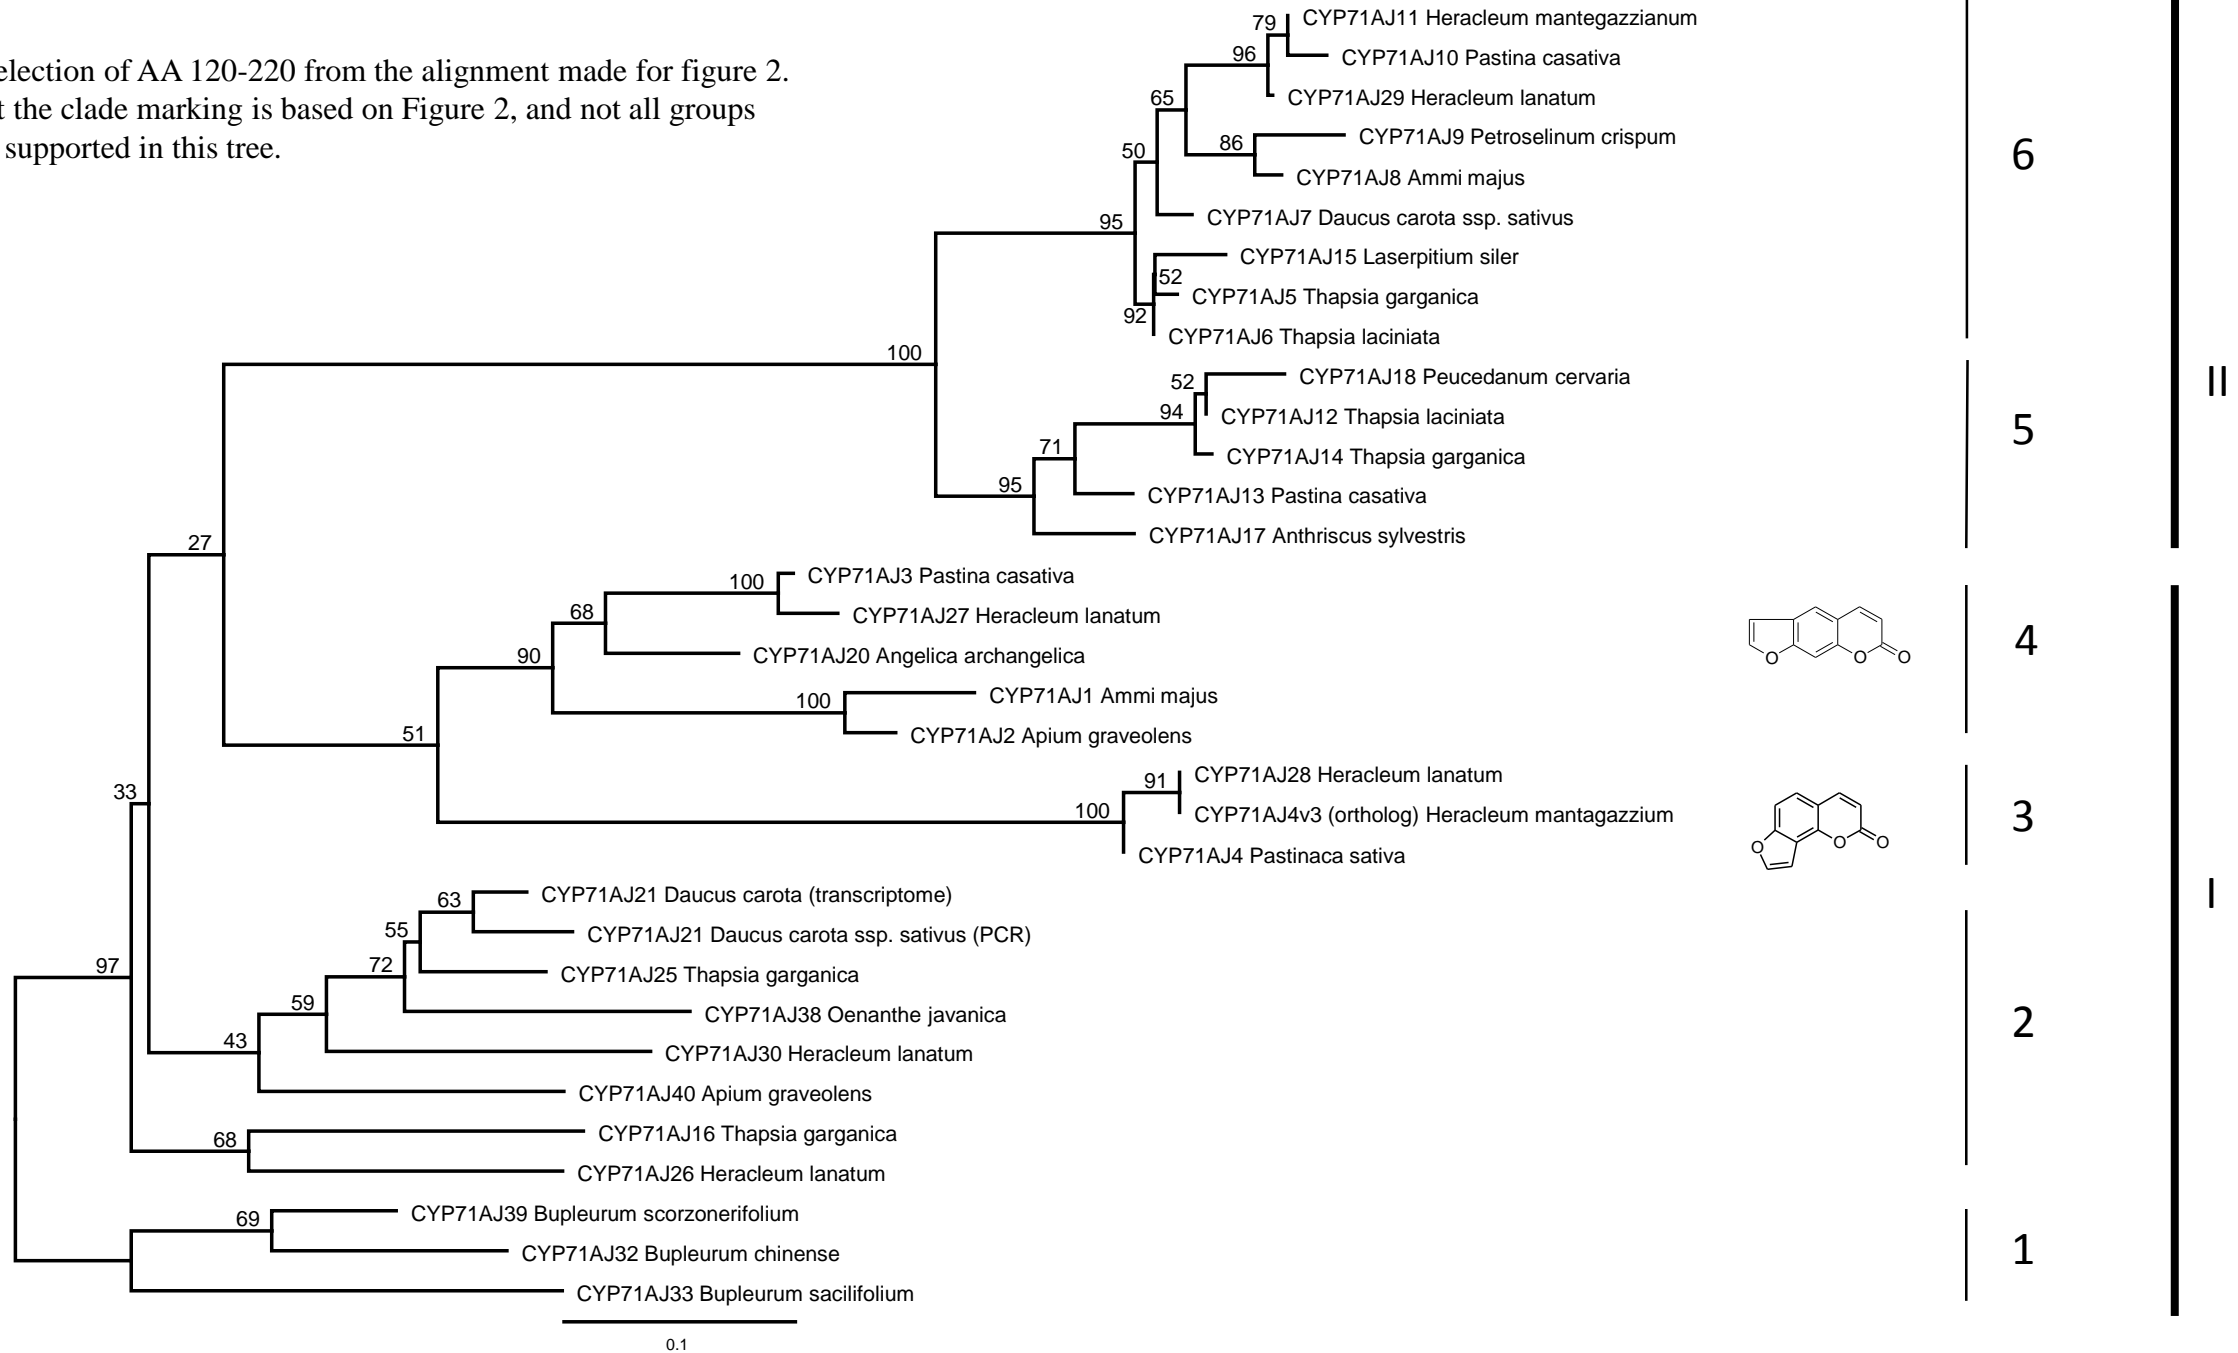



Supplementary file 5

Partial tree of the selection of AA 203-307 from the alignment made for figure 2.

Please observe, that the clade marking is based on Figure 2, and only a few groups and clades are well supported in this tree.

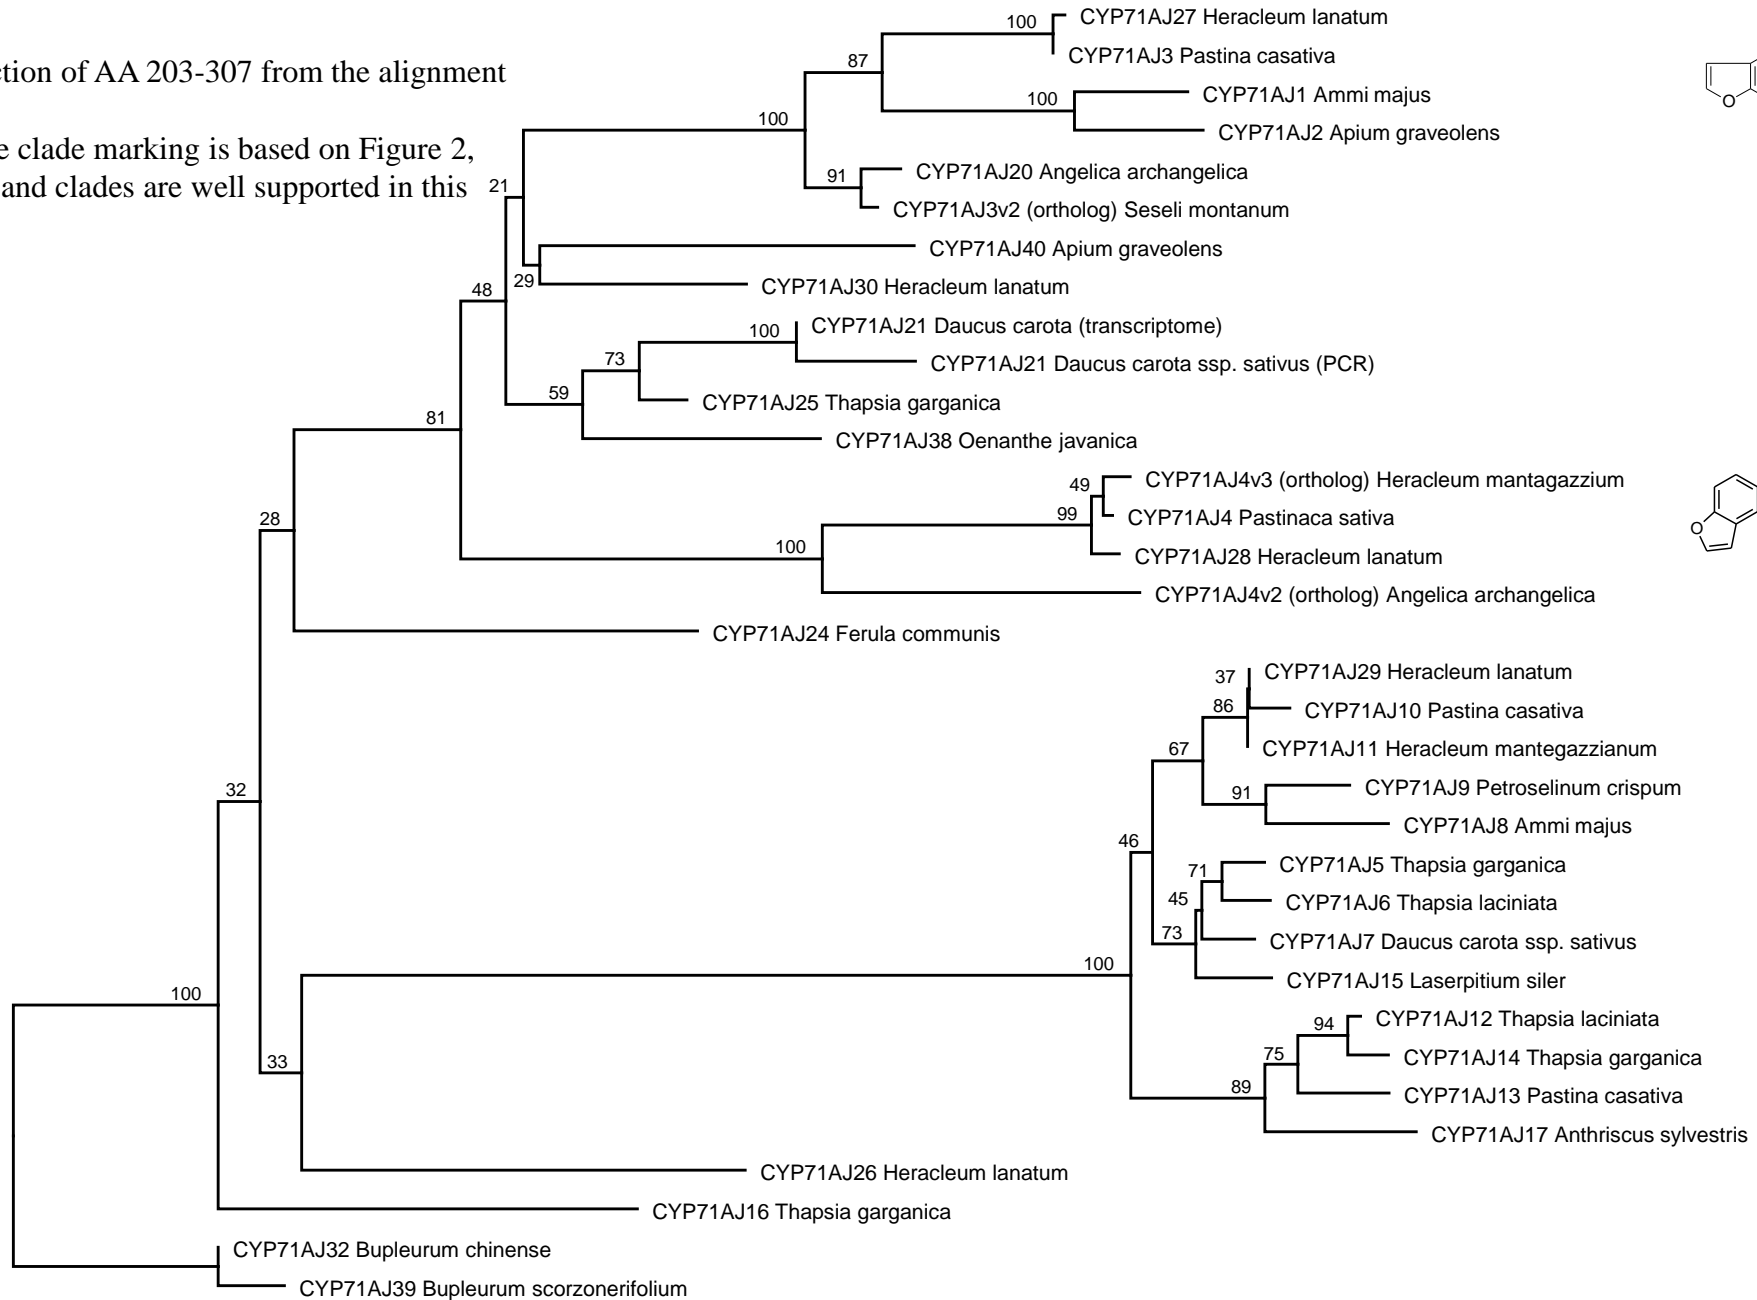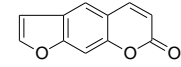

I-3

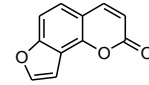

I-4

1



Supplementary file 5

Partial tree of the selection of AA 380-509 from the alignment made for figure 2.

Please observe, that the clade marking is based on Figure 2, and not all groups and clades are well supported in this tree.

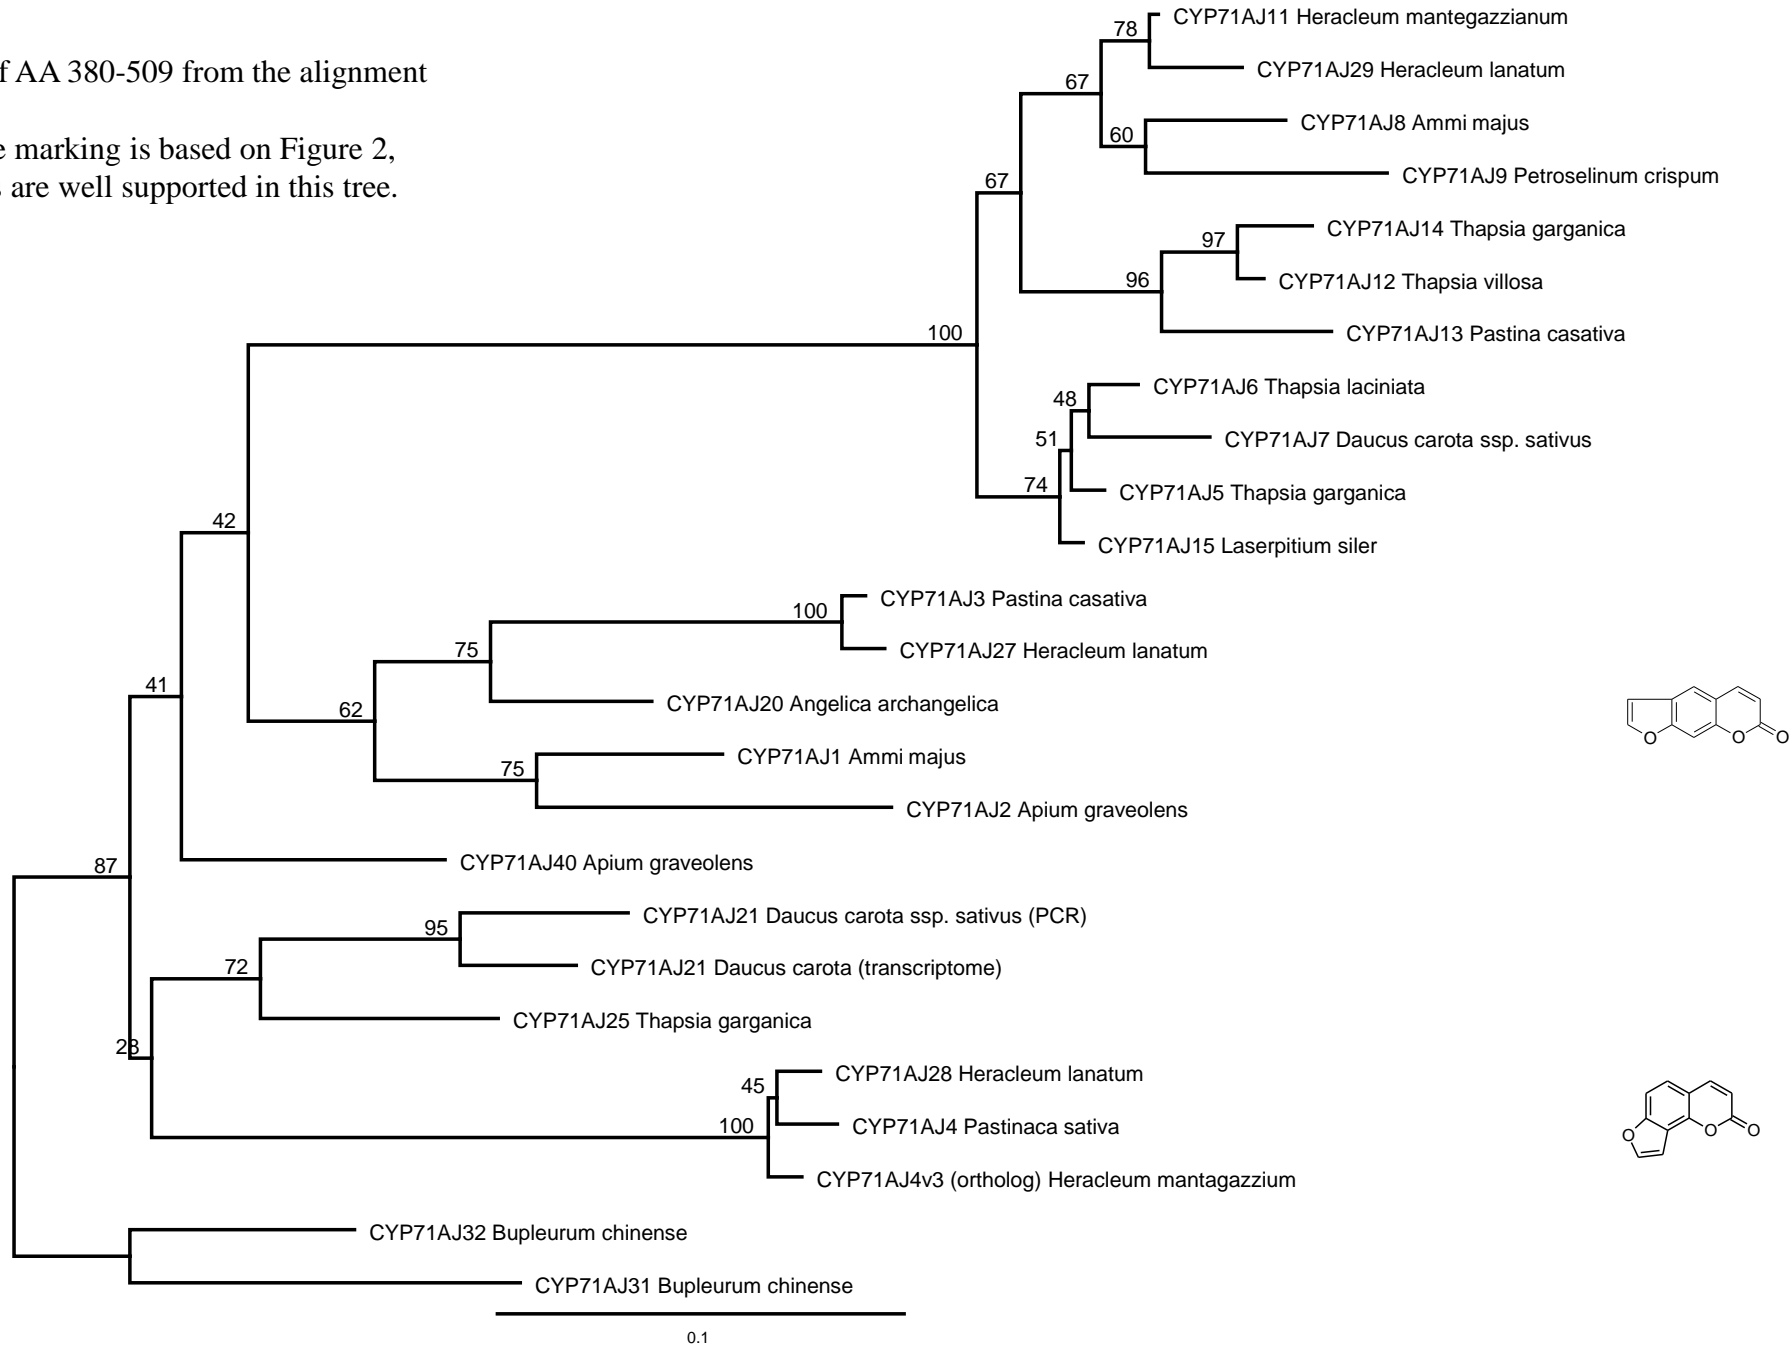

# Muscle Alignment of partial sequences from AA 380-509

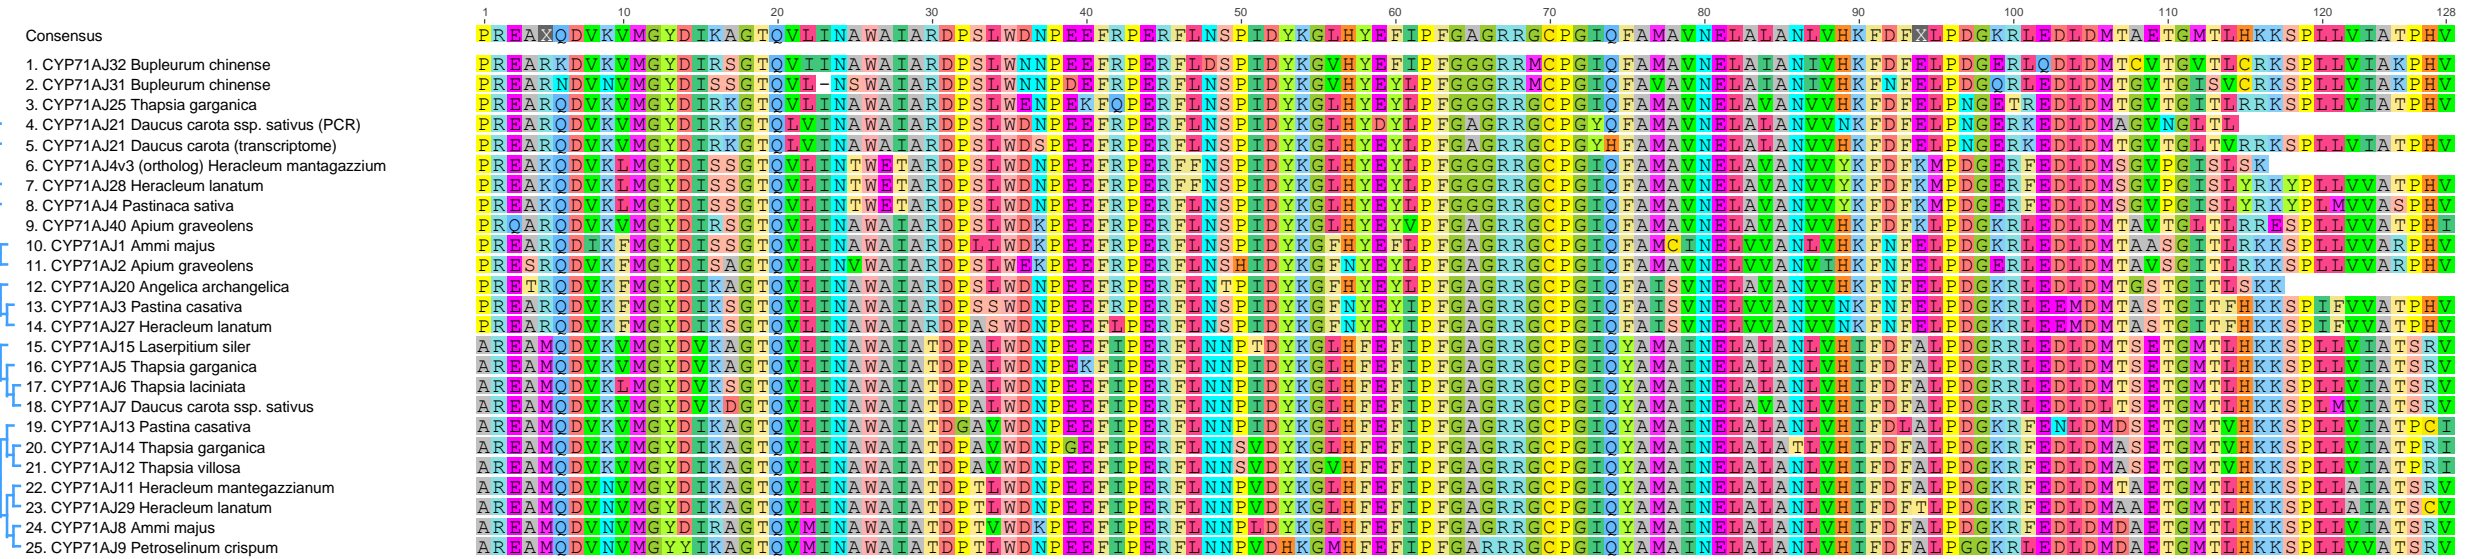

Supplement: 12862_2015_396_MOESM4_ESM.pdf [file 12862_2015_396_MOESM4_ESM.pdf]
